# Supplementary material
Source: MDPI journal article supplement (https://www.mdpi.com/1999-4907/12/6/769)
Supplement: s1 [file s1]

Archive with 2 entries (2 files):
- forests-1214656-supplementary.pdf
- Supplementary Figures S3-S8.zip
