# Supplementary material
Source: MDPI journal article supplement (https://www.mdpi.com/1999-4907/12/6/769)
Supplement: s1 [file s1]

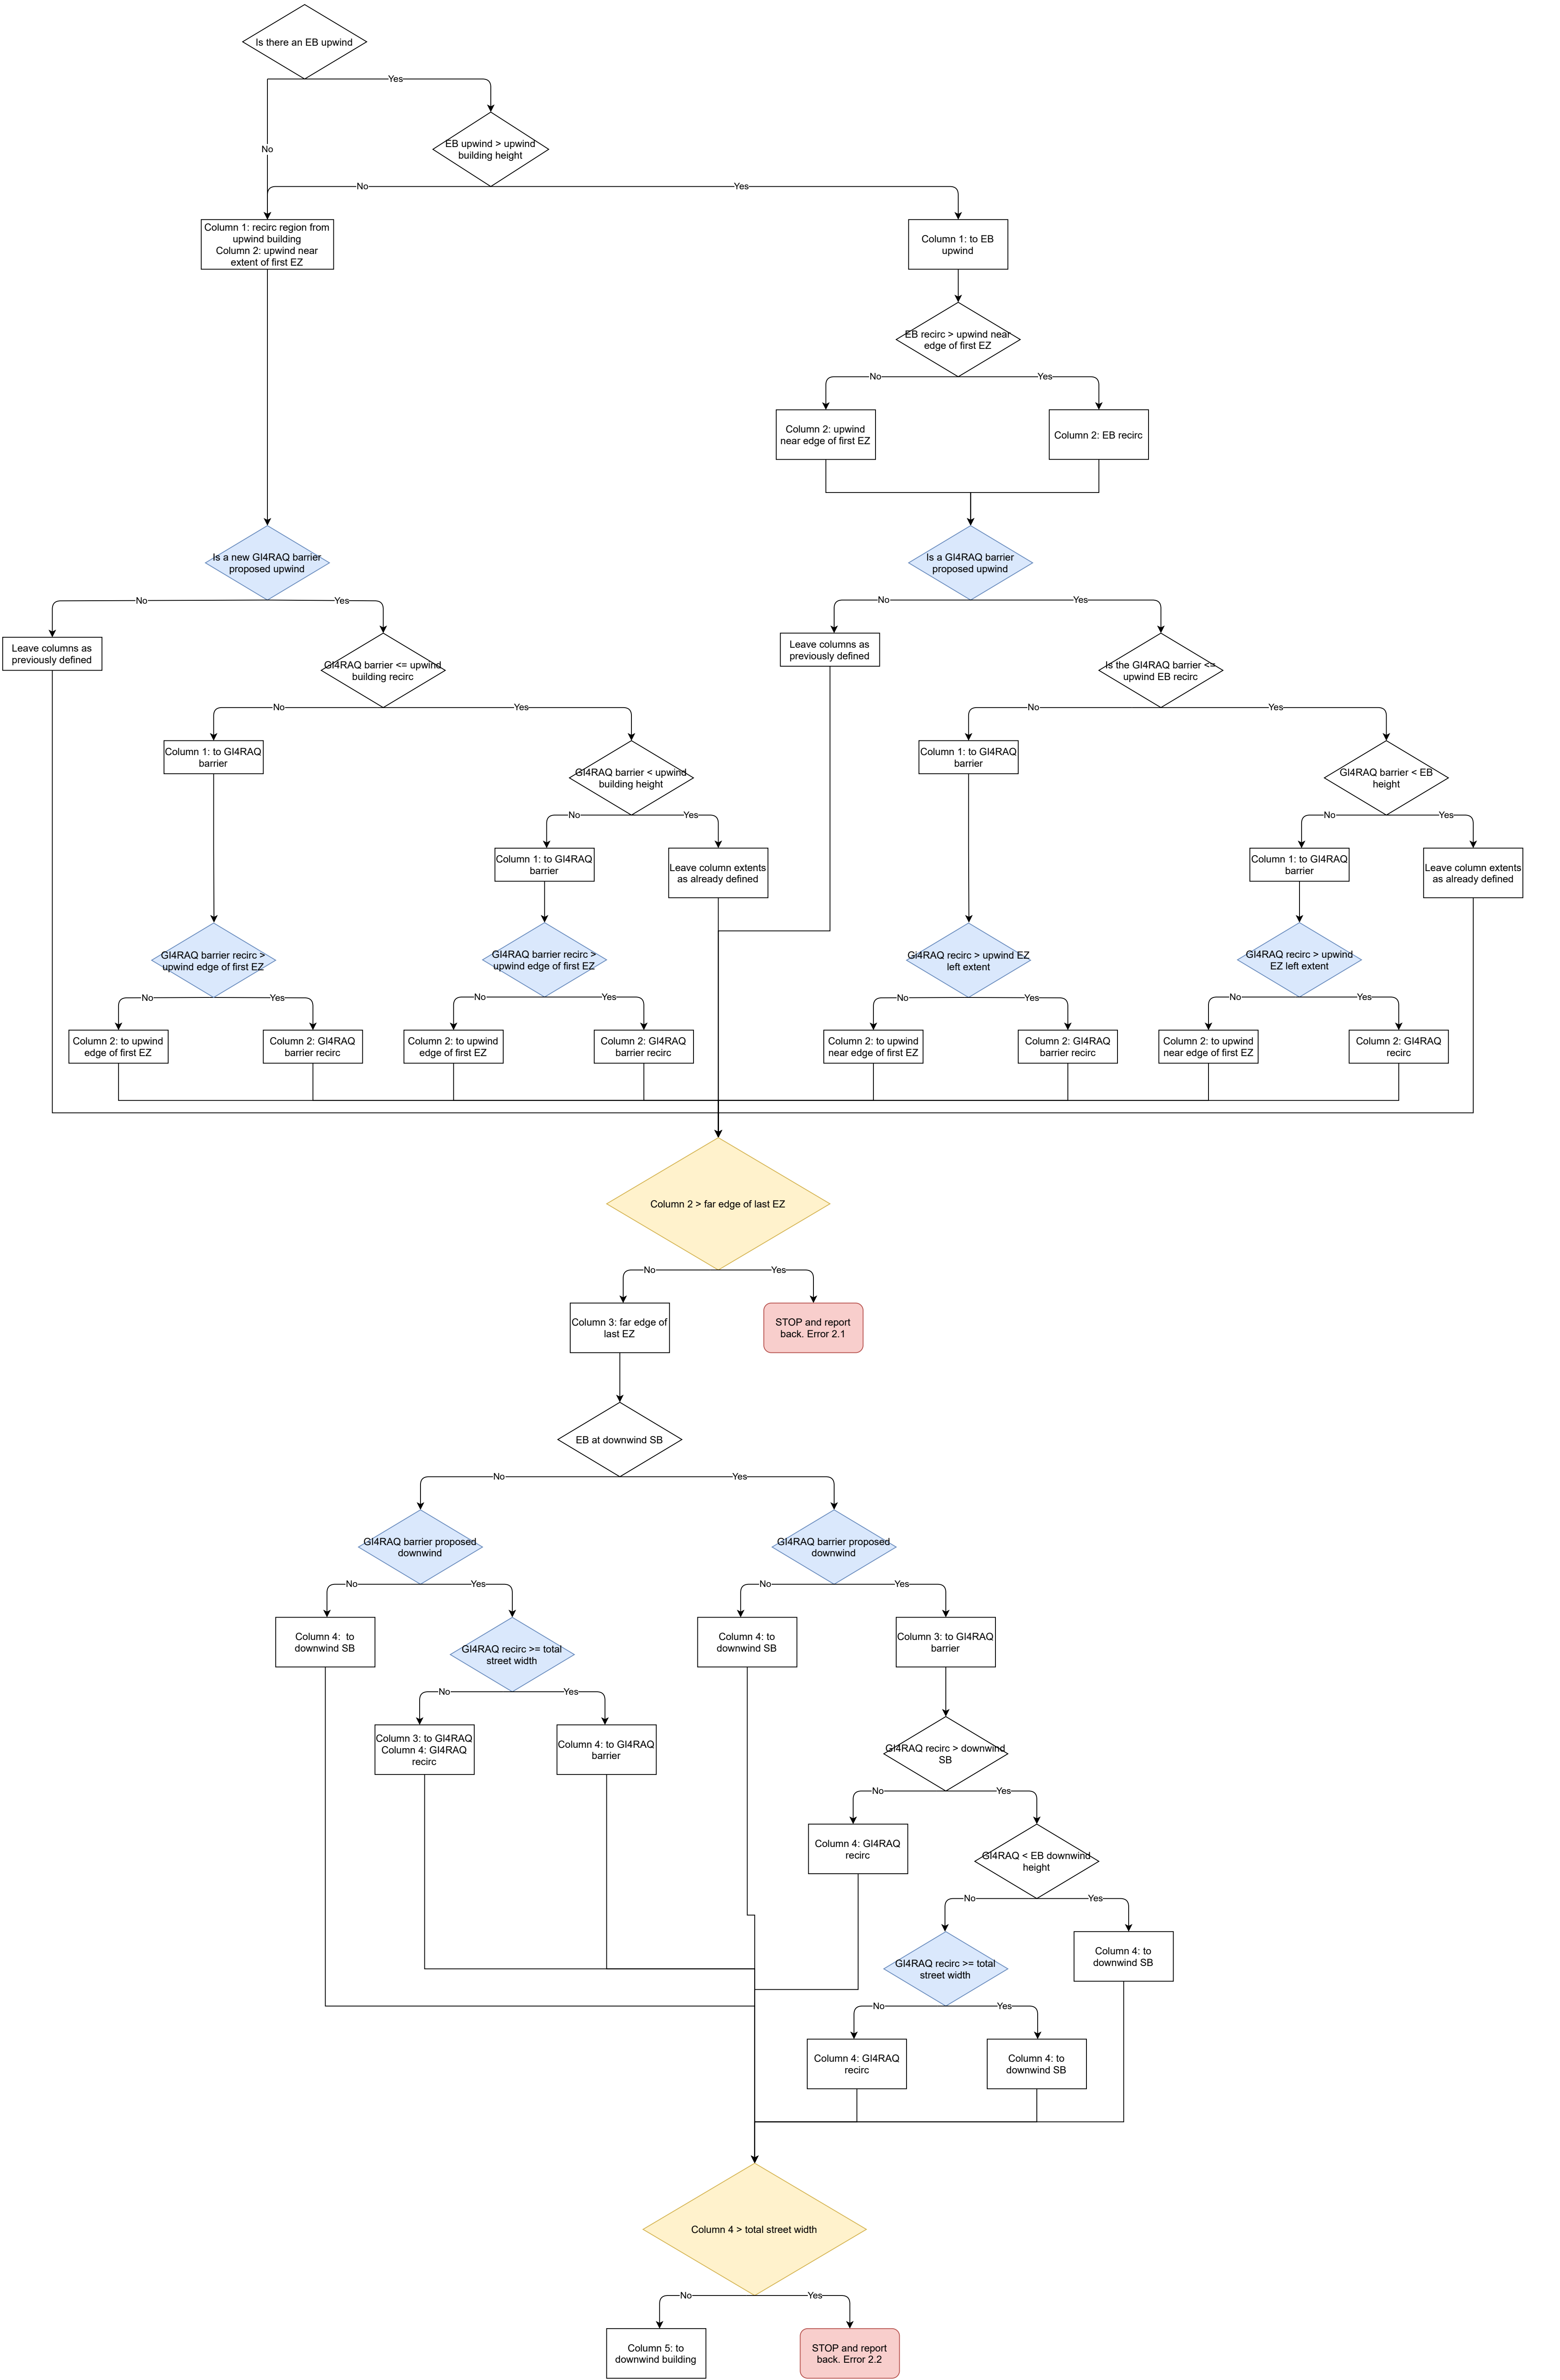

Figure S4: Flowchart detailing the logic used to determine column locations for all combinations and permutations of barriers when the upwind building recirculation falls between the upwind street boundary and the upwind edge of the first emission zone
