# Supplementary material
Source: MDPI journal article supplement (https://www.mdpi.com/1999-4907/12/6/769)
Supplement: s1 [file s1]

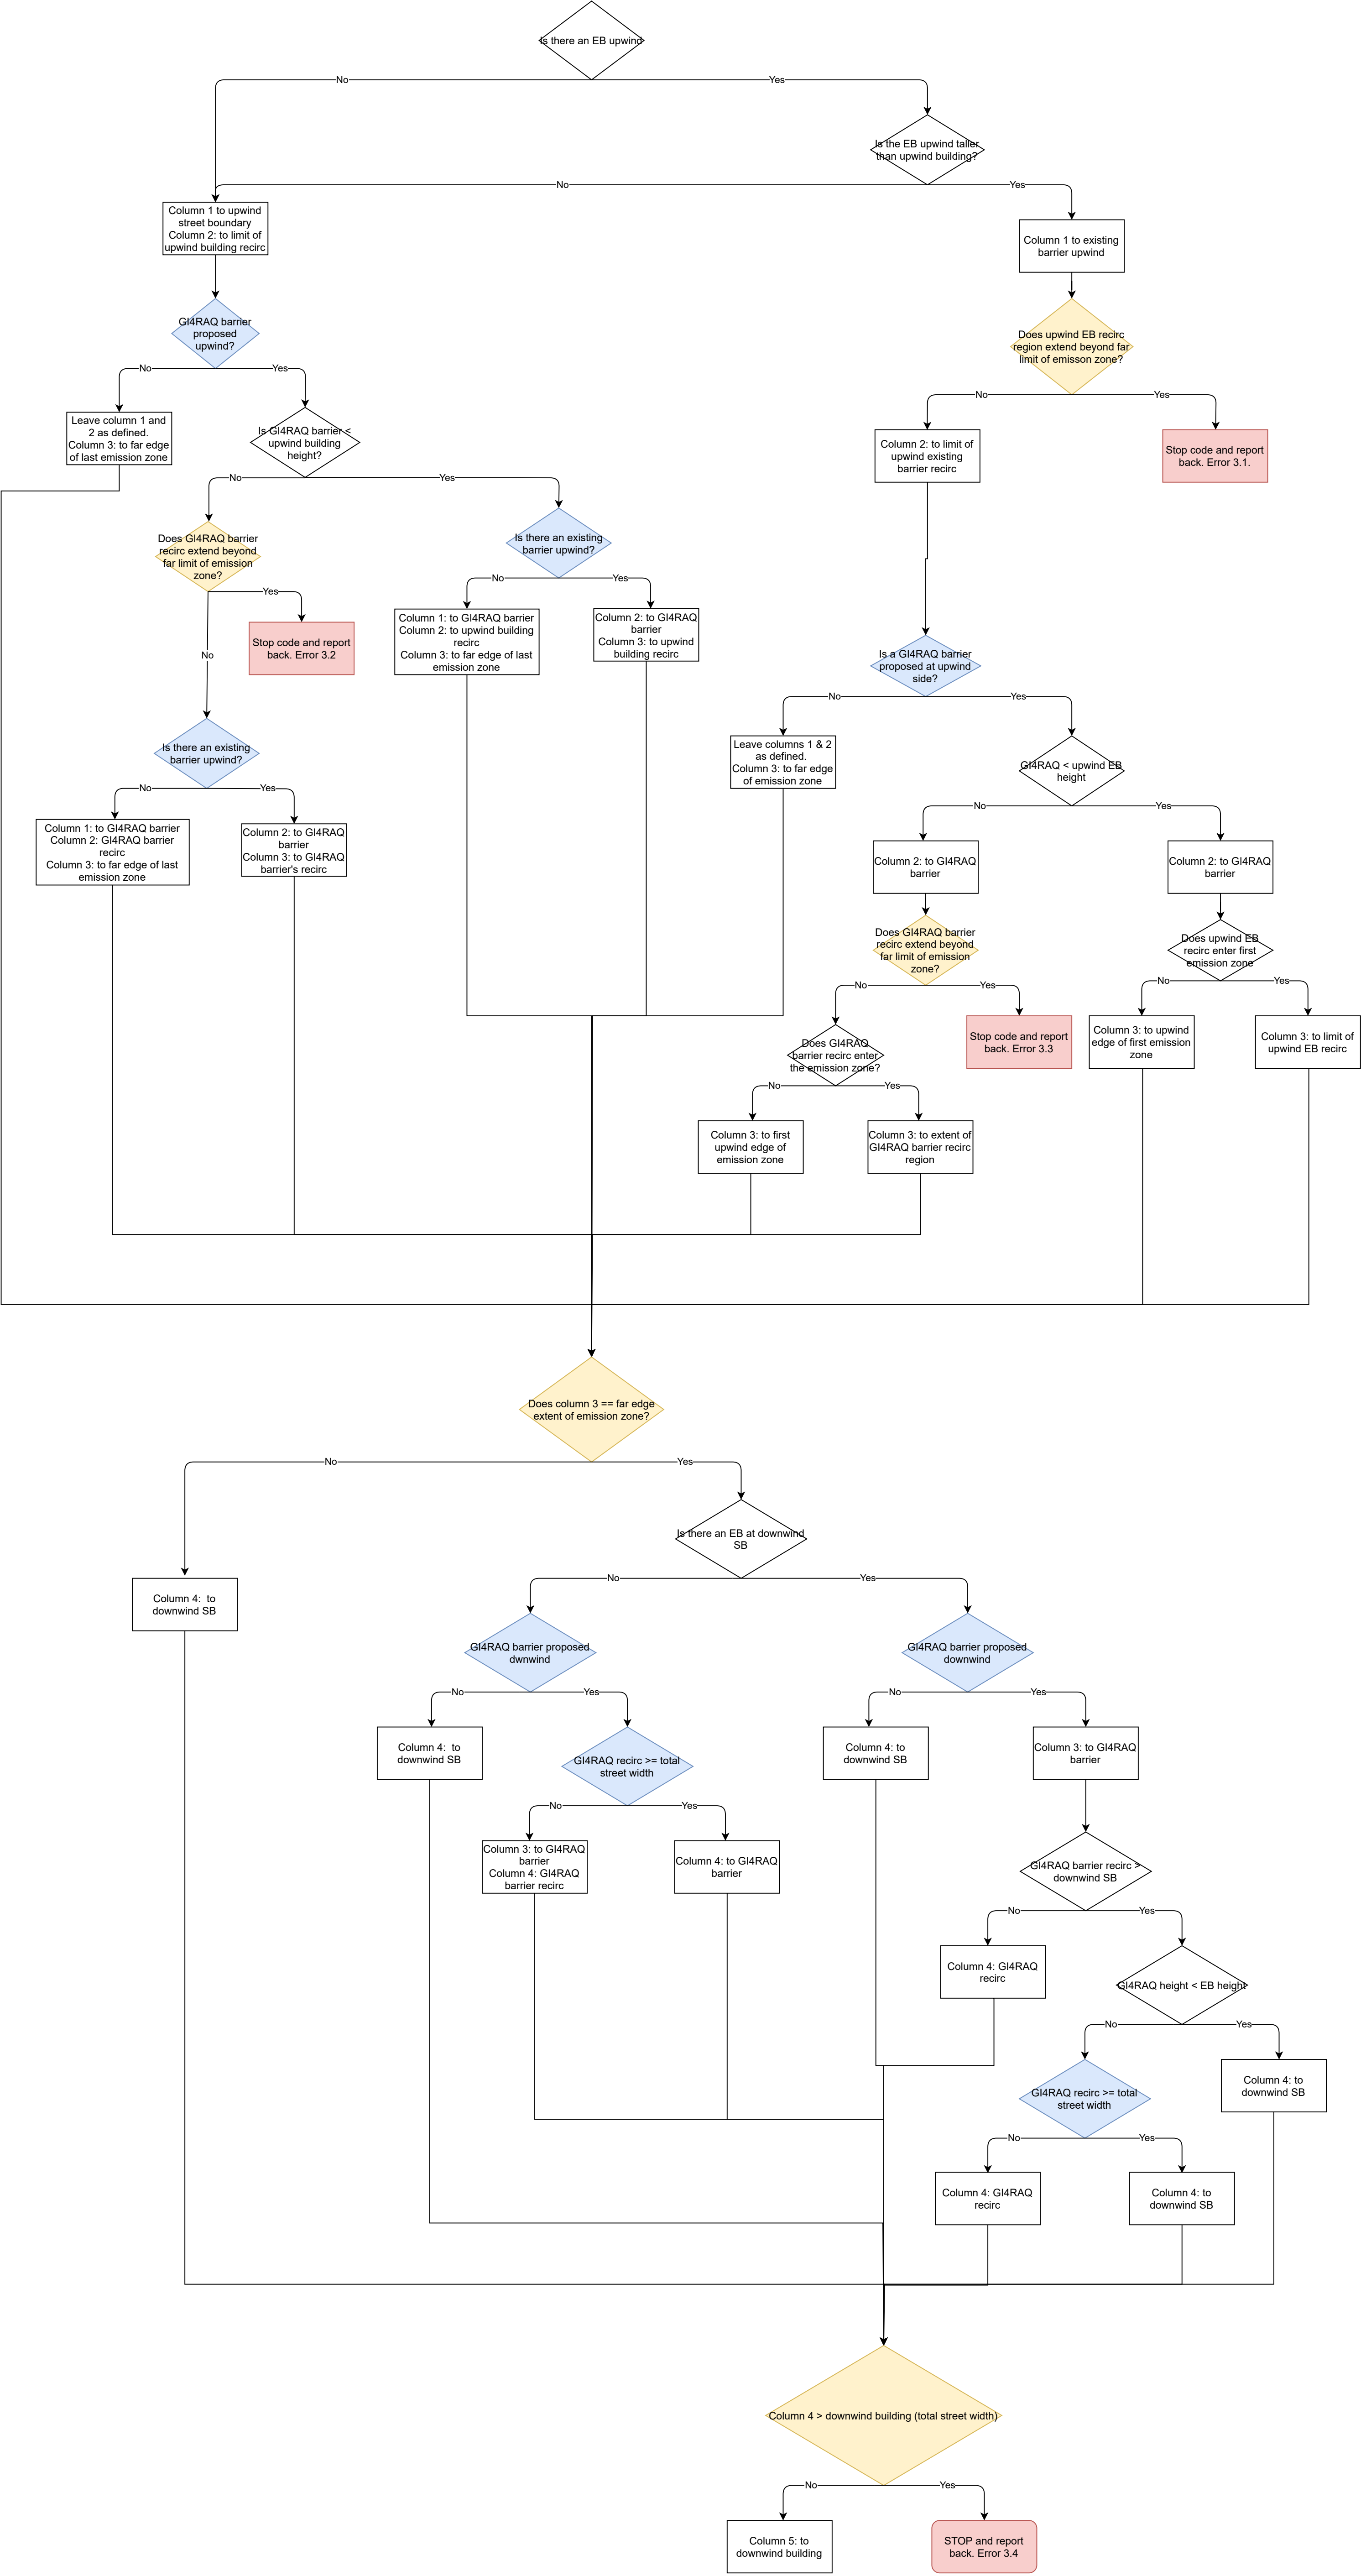

Figure S5: Flowchart detailing the logic used to determine column locations for all combinations and permutations of barriers when the upwind building recirculation falls between the start of the first emission zone and the downwind edge of the last emission zone
