# Supplementary material
Source: MDPI journal article supplement (https://www.mdpi.com/1999-4907/12/6/769)
Supplement: s1 [file s1]

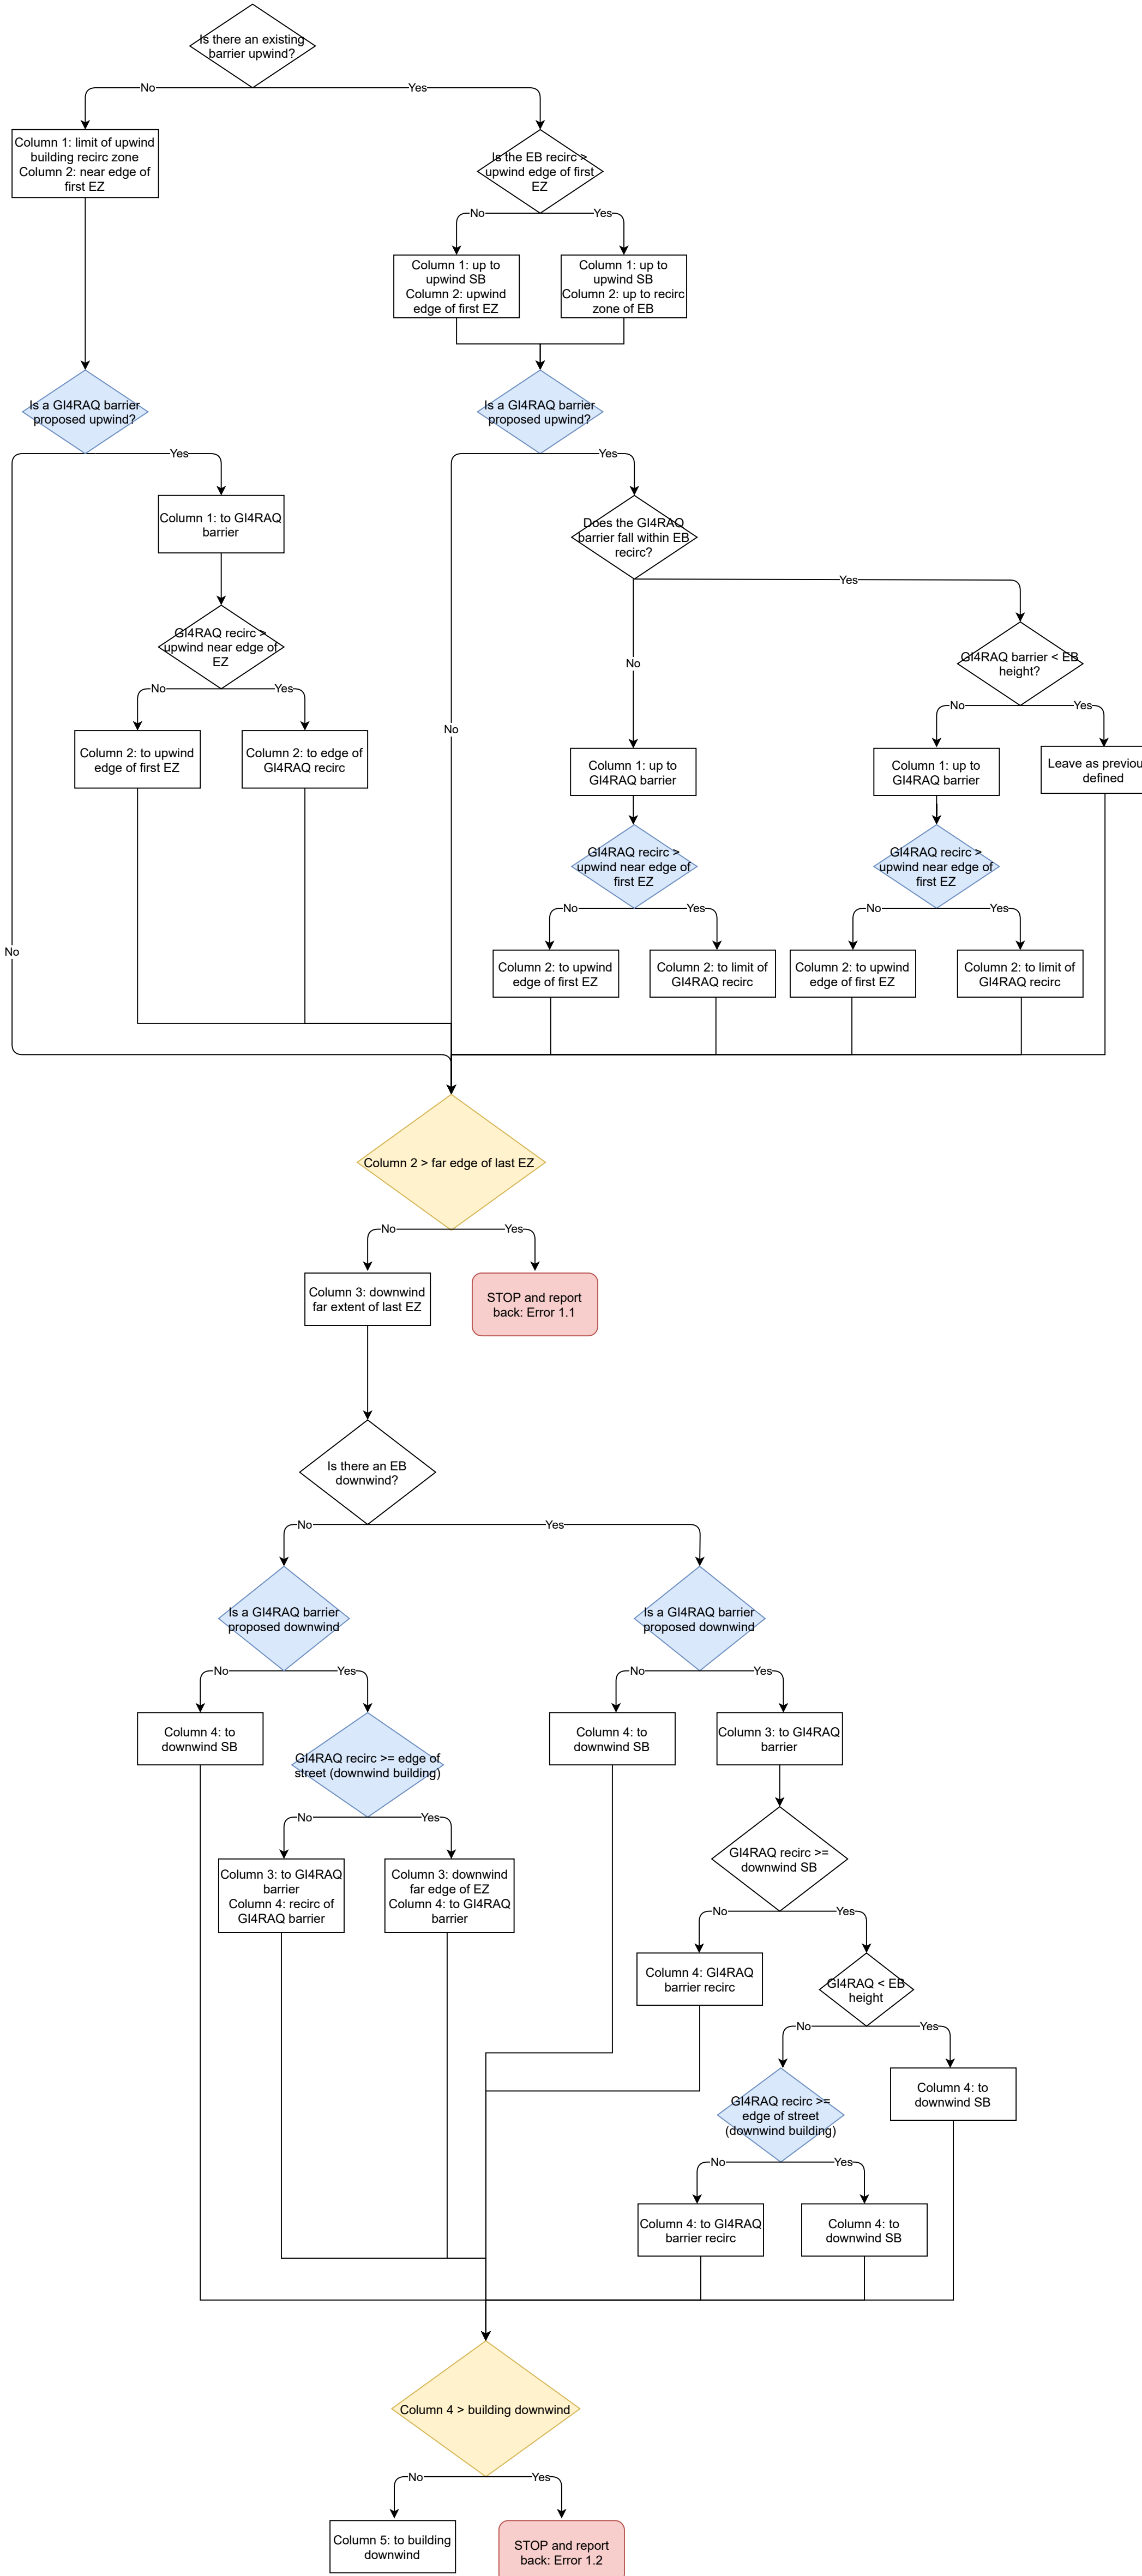

**Figure S3:** Flowchart detailing the logic used to determine column locations for all combinations and permutations of barriers when the upwind building recirculation extends up to the upwind street boundary
