# Supplementary material
Source: MDPI journal article supplement (https://www.mdpi.com/1999-4907/12/6/769)
Supplement: s1 [file s1]

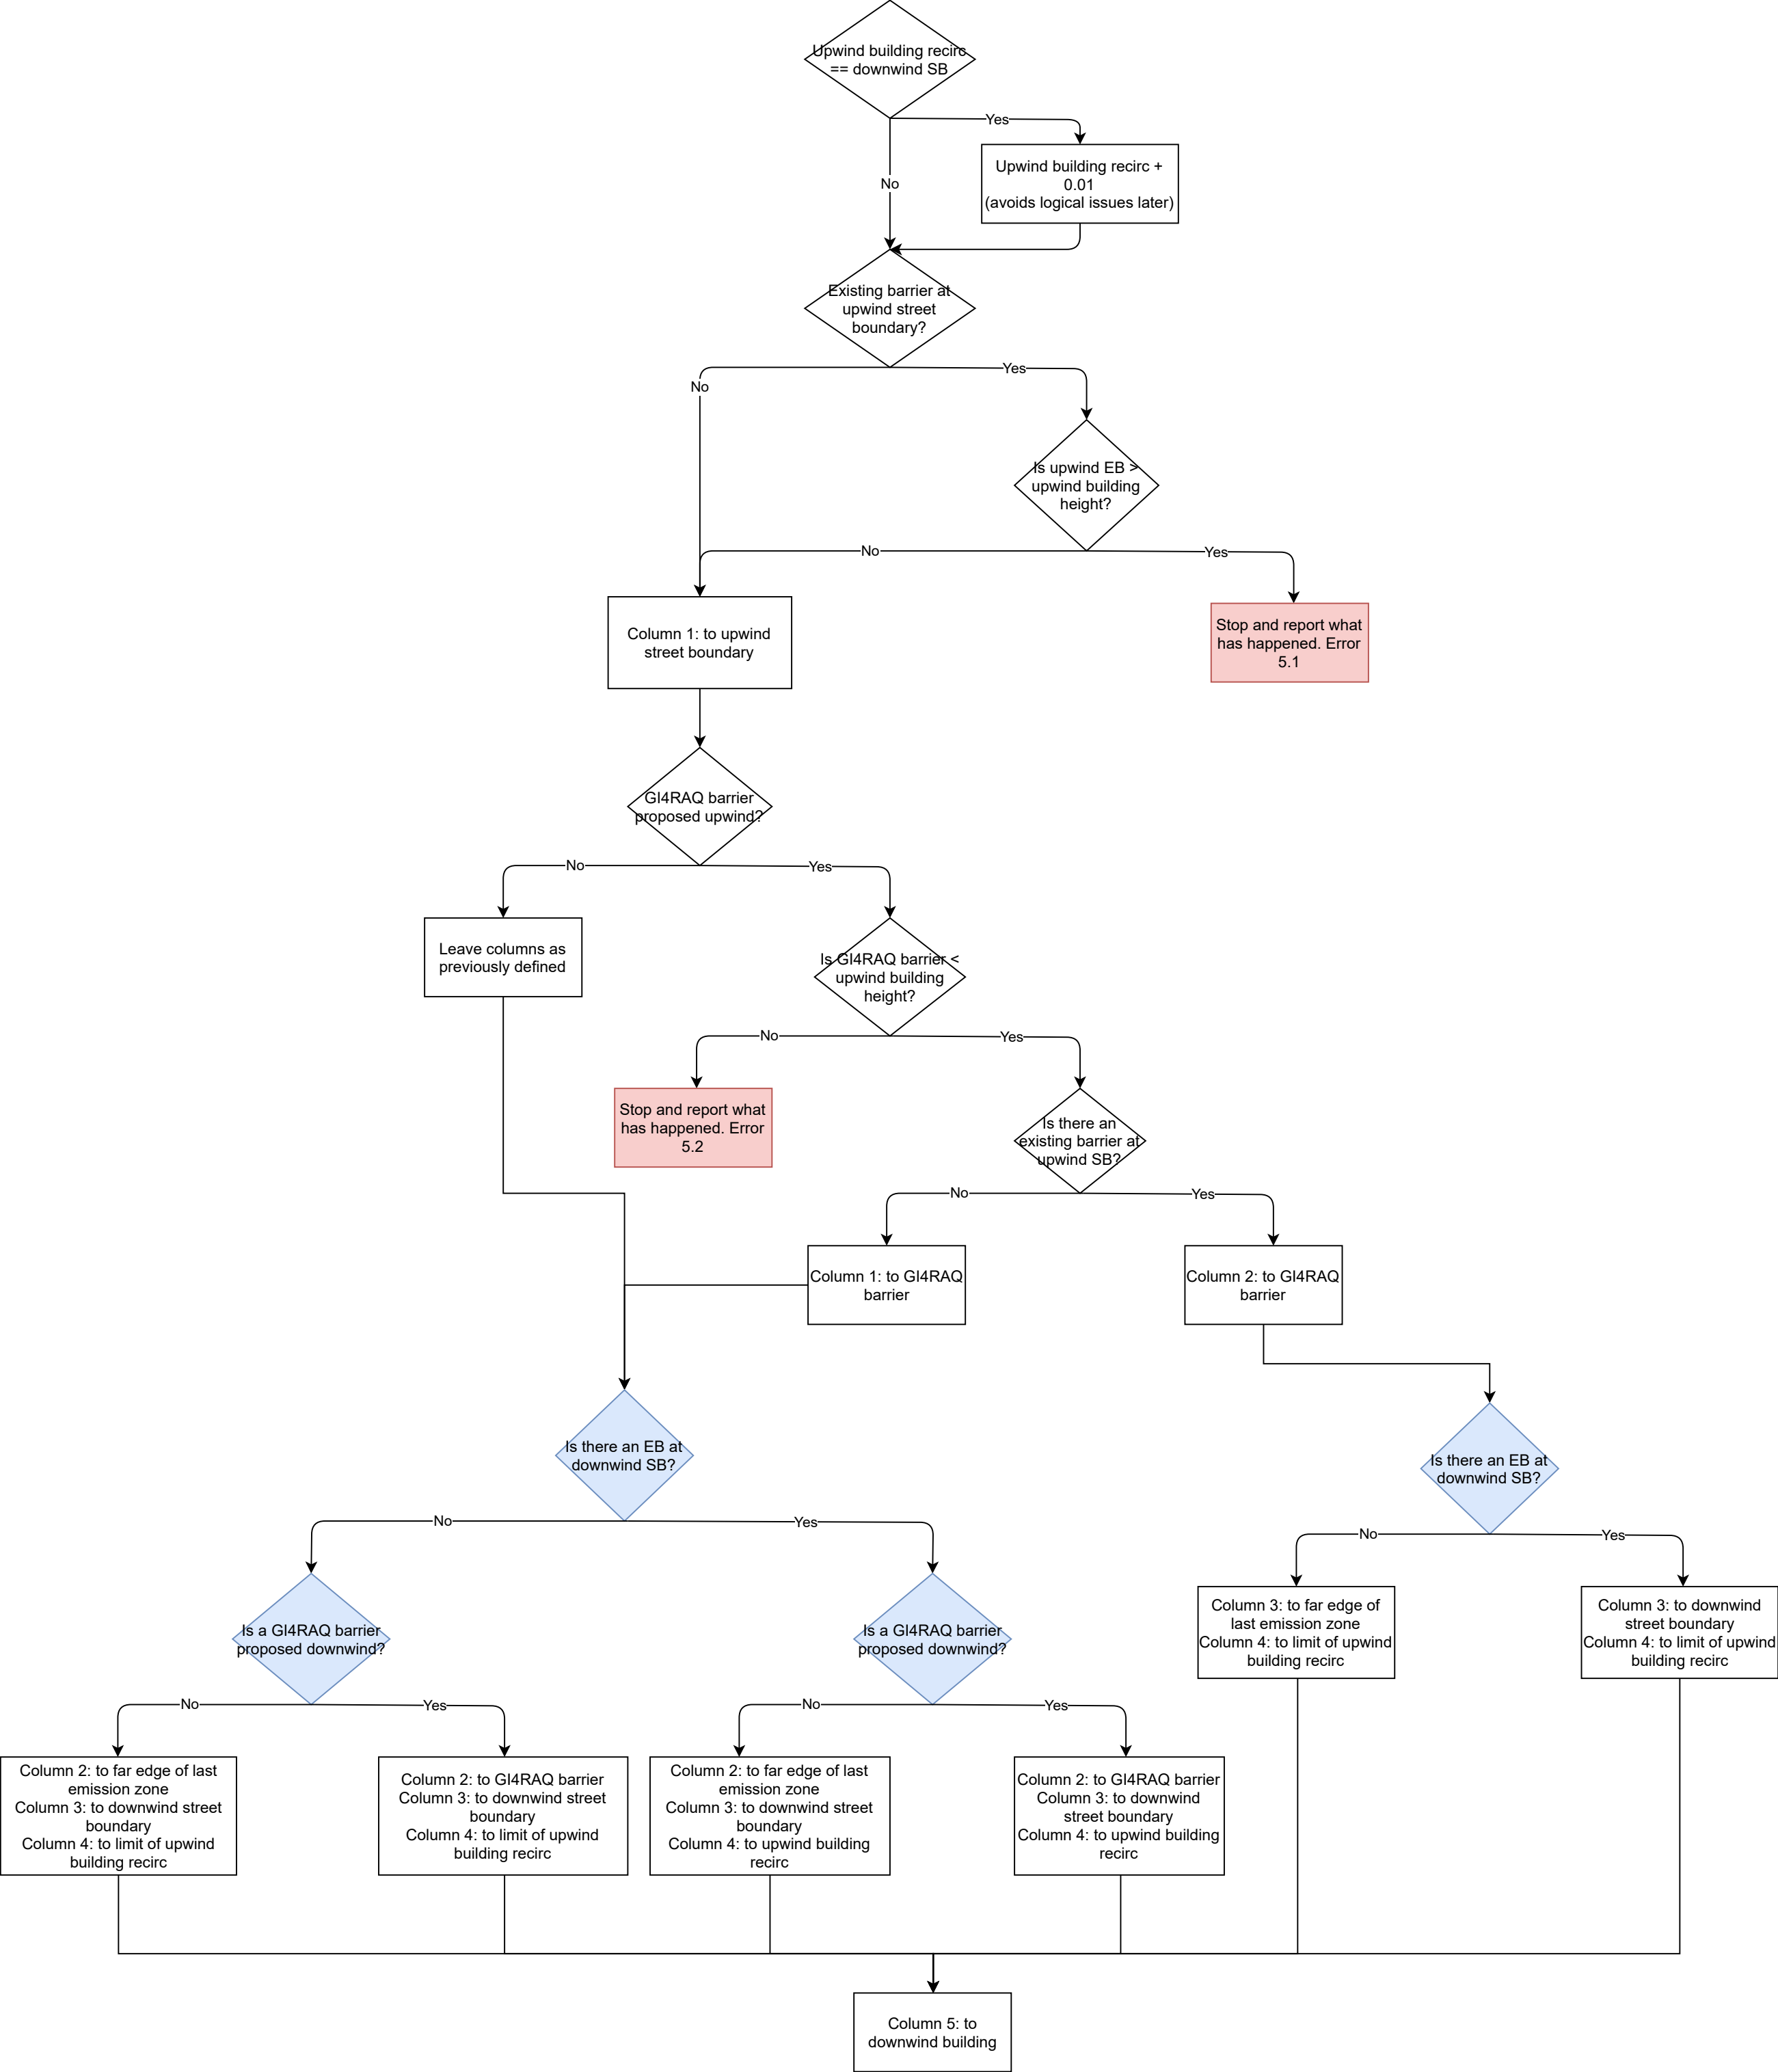

**Figure S7:** Flowchart detailing the logic used to determine column locations for all combinations and permutations of barriers when the upwind building recirculation falls between the downwind street boundary and the downwind building
